# Supplementary material for: Hydrophobic myristic acid modified PAMAM dendrimers augment the delivery of tamoxifen to breast cancer cells
Source: Royal Society of Chemistry journal article supplement (doi:10.1039/c6ra02391f), 2016-01-01
Supplement: c6ra02391f1.pdf [file c6ra02391f1.pdf]

## **Supporting Information**

### **Hydrophobic Myristic acid Modified PAMAM Dendrimers Augments the Delivery of Tamoxifen to Breast Cancer Cells**

Ishita Matai<sup>a</sup> and P.Gopinath<sup>\*a,b</sup>

*<sup>a</sup>Nanobiotechnology Laboratory, Centre for Nanotechnology,*

*Indian Institute of Technology Roorkee, Roorkee, Uttarakhand-247667, India.*

*<sup>b</sup>Department of Biotechnology,*

*Indian Institute of Technology Roorkee, Roorkee, Uttarakhand-247667, India.*

*Fax: +91-1332-273560; Tel: 91-1332-285650;*

*\*E-mail: [pgopifnt@iitr.ernet.in](mailto:pgopifnt@iitr.ernet.in), [genegopi@gmail.com](mailto:genegopi@gmail.com)*

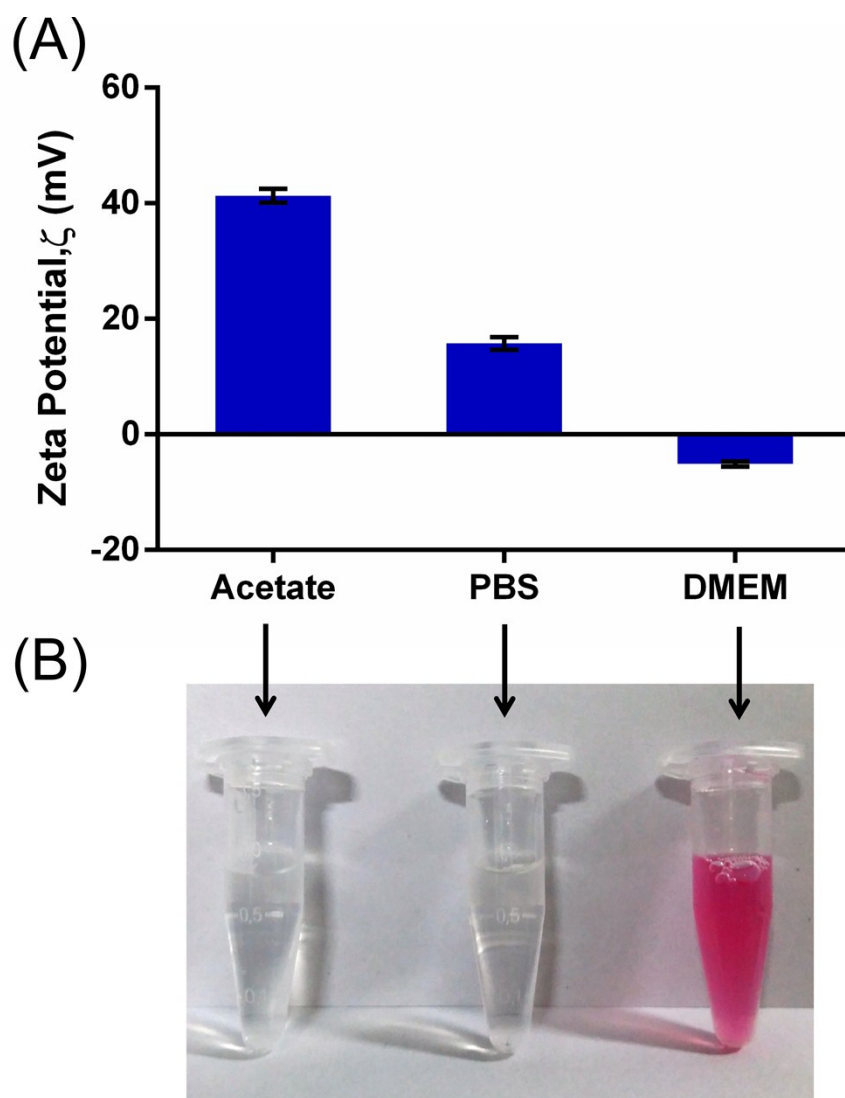

**Figure S1.** A) Zeta potential measurements of My-g-G5 dendrimers in acetate buffer (pH 5.5), PBS (pH 7.4) and DMEM medium, respectively. The values are expressed as mean  $\pm$  SEM) (n=3). B) The corresponding digital photographs of My-g-G5 dendrimers in different medium under daylight.

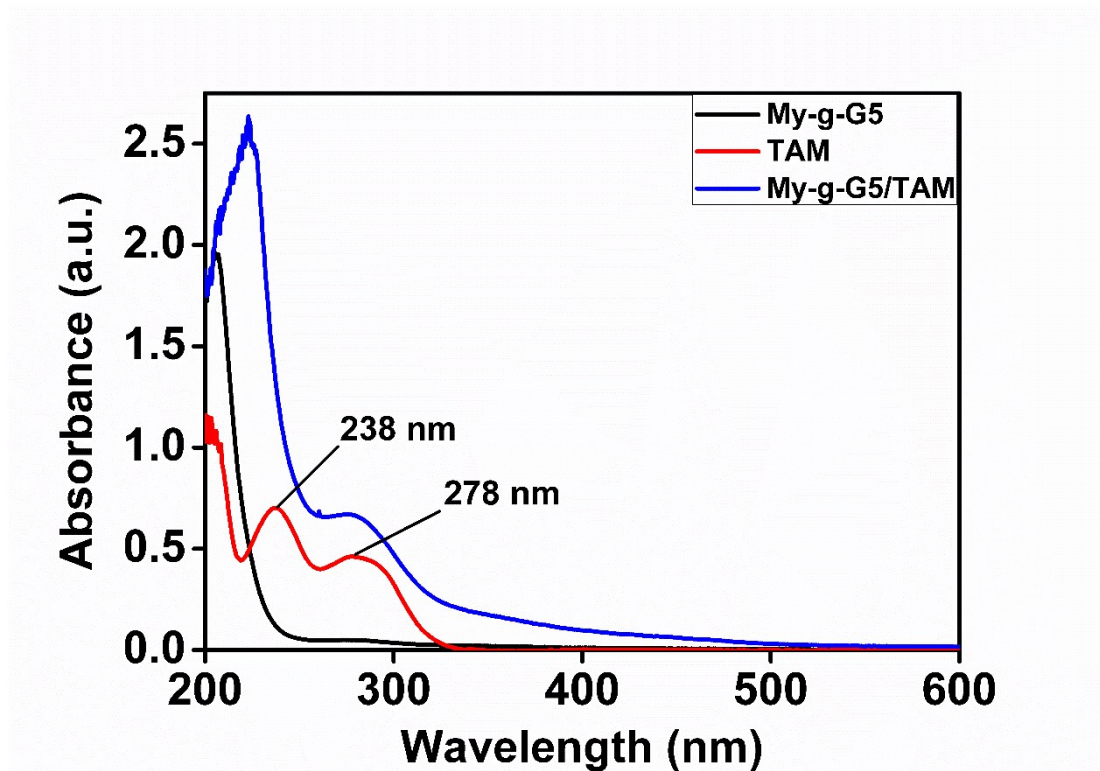

*Figure S2. UV-vis absorption spectra of free TAM in methanol and aqueous solutions of My-g-G5 and My-g-G5/TAM complexes.*

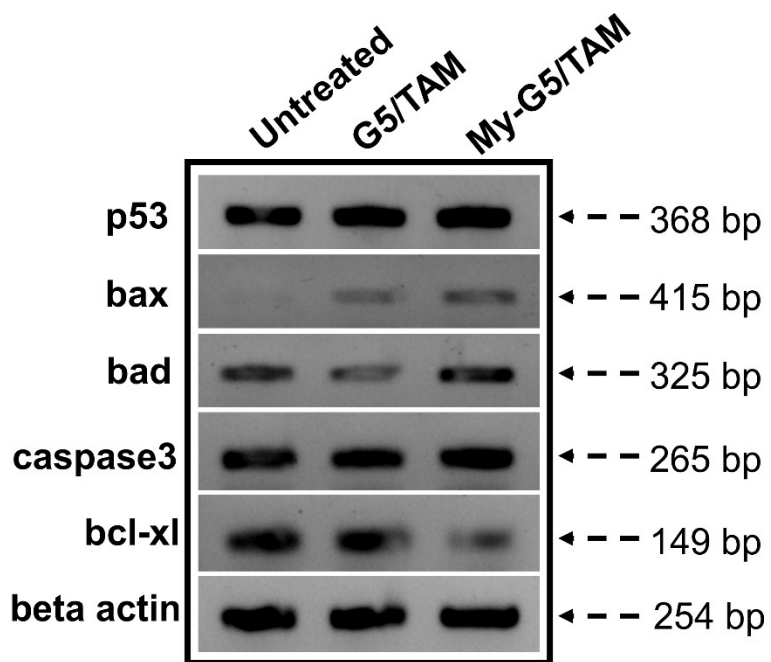

**Figure S3.** Comparative gene expression analysis of G5/TAM and My-g-G5/TAM treated MCF-7 cells.
